# Supplementary figures and images for: Associative Overdominance and Negative Epistasis Shape Genome-Wide Ancestry Landscape in Supplemented Fish Populations
Source: MDPI journal article supplement (doi:10.3390/genes12040524), 2021-04-03

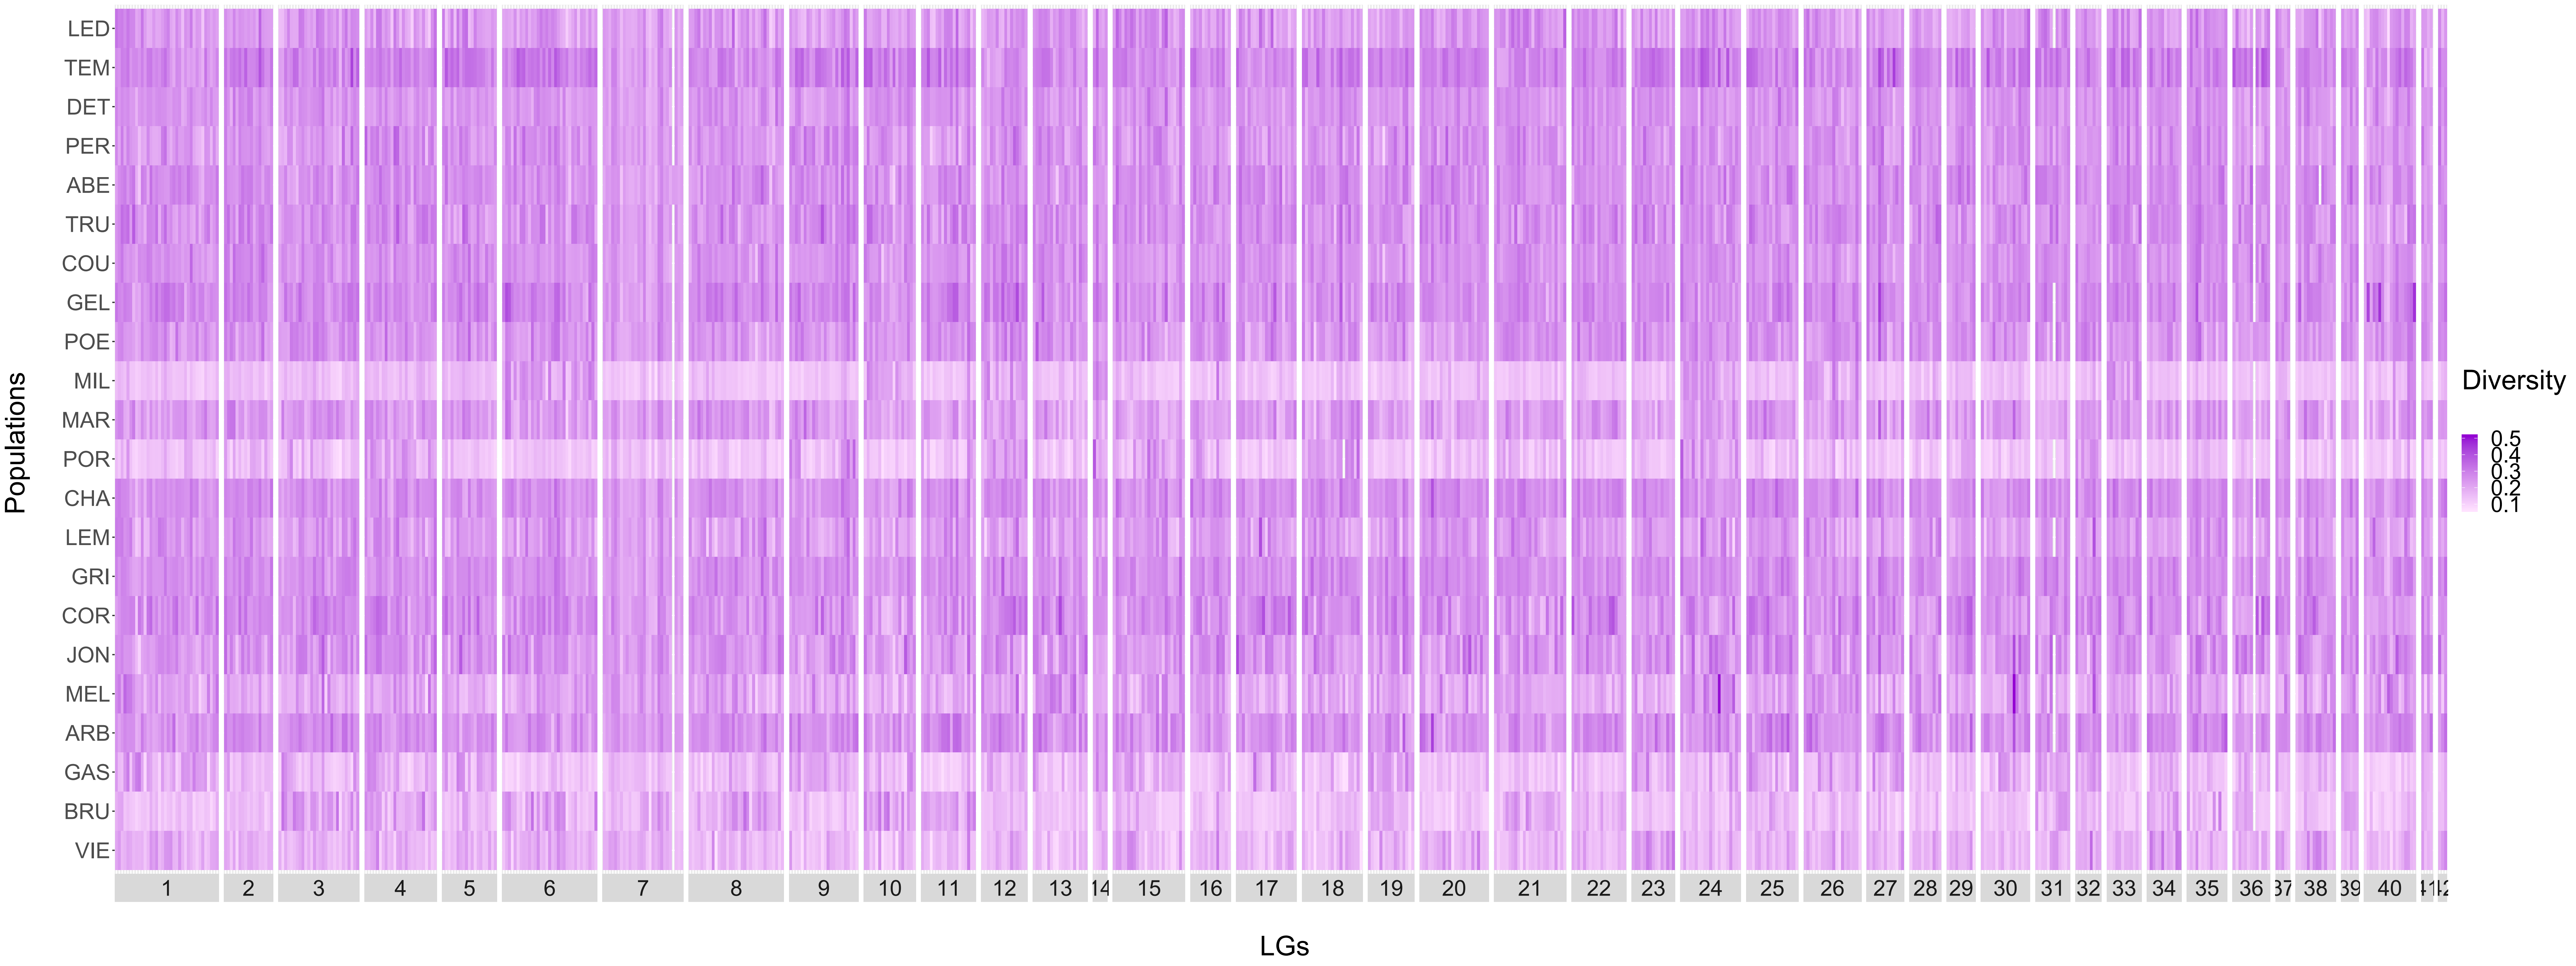

Supplement: s1 [file s1]

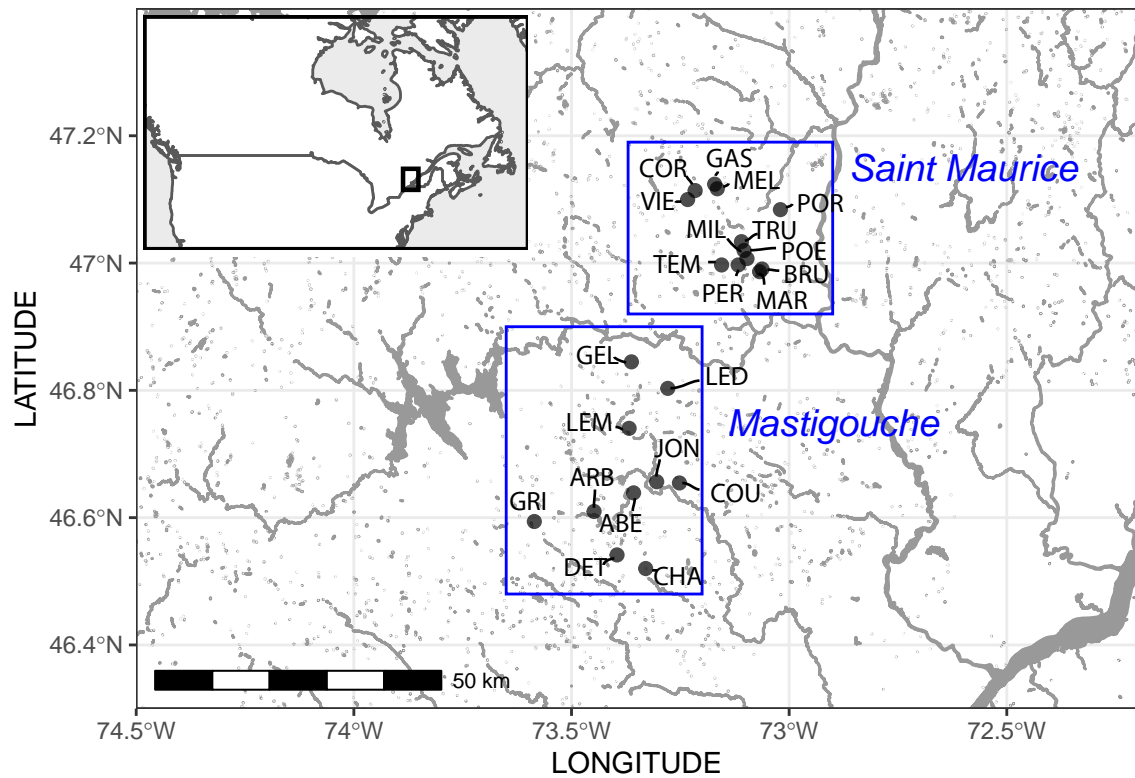

Supplement: s1 [file s1]
